# Supplementary material
Source: publisher site journal article supplement (https://www.dovepress.com/article/282881)
Supplement: Supplementary file 1 [file get_supplementary_file.php]

**Appendix 1.**

**Table S1:** Changes in Knowledge and Ability, by Retreat, by Session, P and Z* Score Analysis

| **2019 Face-to-Face Instruction** | | | **2020 Virtual Instruction** | | |
| --- | --- | --- | --- | --- | --- |
| **Session title** | **Knowledge** | **Ability** | **Session title** | **Knowledge** | **Ability** |
| **Orange retreat** | | | | | |
| Peer coaching | Z = -3.895  P = 0.000 | Z = -3.895  P = 0.000 | Peer coaching | Z = -4.907  P = 0.000 | Z = -4.867  P = 0.000 |
| Communicating in high stakes situations | Z = -4.739  P = 0.000 | Z = -4.747  P = 0.000 | Communicating in high stakes situations | Z = -4.818  P = 0.000 | Z = -4.754  P = 0.000 |
| Dealing with conflict | Z = -4.585  P = 0.000 | Z = -4.592  P = 0.000 | Dealing with conflict | Z = -5.009  P = 0.000 | Z = -4.690  P = 0.000 |
| Systems thinking | Z = -4.409  P = 0.000 | Z = -4.425  P = 0.000 | Systems thinking | Z = -4.450  P = 0.000 | Z = -4.378  P = 0.000 |
| Policy solutions for wicked problems | Z = -4.894  P = 0.000 | Z = -4.817  P = 0.000 | Policy solutions for wicked problems | Z = -4.627  P = 0.000 | Z = -4.580  P = 0.000 |
| **Green retreat** | | | | | |
| Negotiation | Z = -4.066  P = 0.000 | Z = -4.055  P = 0.000 | Negotiation | Z = -4.155  P = 0.000 | Z = -4.045  P = 0.000 |
| Media communication | Z = -4.253  P = 0.000 | Z = -3.891  P = 0.000 | Media communication | Z = -3.672  P = 0.000 | Z = -3.650  P = 0.000 |
| Recovery, resilience & resistance: Communities responding to disasters | Z = -4.183  P = 0.000 | Z = -3.981  P = 0.000 | Recovery, resilience & resistance: Communities responding to disasters | Z = -3.817  P = 0.000 | Z = -3.992  P = 0.000 |
| **Indigo retreat** | | | | | |
| Presenting your best you | Z = -4.253  P = 0.000 | Z = -4.212  P = 0.000 | Presenting your best you | Z = -3.228  P = 0.001 | Z = -3.359  P = 0.001 |
| Presenting, feedback & coaching | Z = -3.676  P = 0.000 | Z = -3.655  P = 0.000 | Presenting, feedback & coaching | Z = -3.342  P = 0.001 | Z = -3.241  P = 0.001 |
| Concept mapping | Z = -2.941  P = 0.003 | Z = -2.801  P = 0.005 | Concept mapping | Z = -3.111  P = 0.002 | Z = -2.588  P = 0.010 |

* Z score results from Wilcoxon Signed Rank tests are based on negative ranks
